# Supplementary material
Source: PubMed Central journal article supplement (PMC1420654)
Supplement: pcbi.0020016.sg001.pdf [file pcbi.0020016.sg001.pdf]

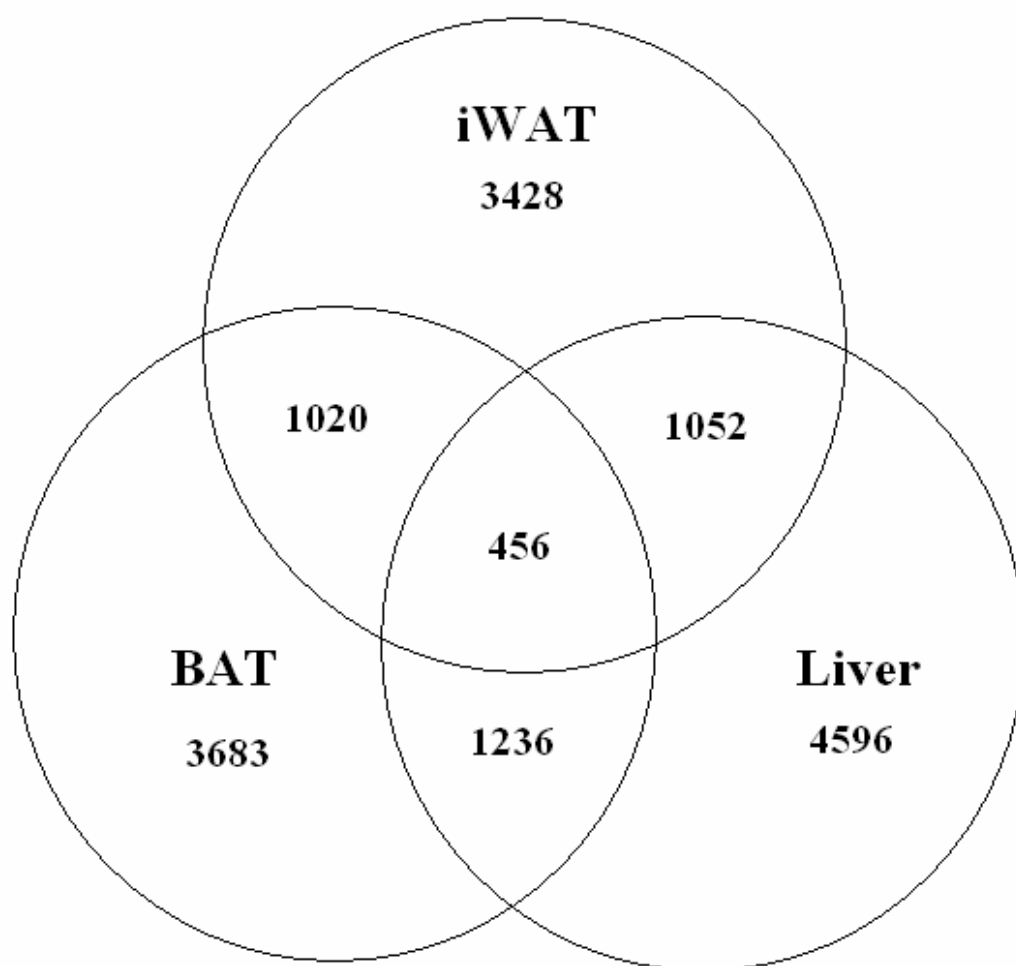

**Supplemental Figure 1. Venn diagram of circadianly expressed genes revealed by permutation test with  $p=0.05$  cutoff.**
