# Supplementary material
Source: PubMed Central journal article supplement (PMC1420654)
Supplement: pcbi.0020016.sg004.pdf [file pcbi.0020016.sg004.pdf]

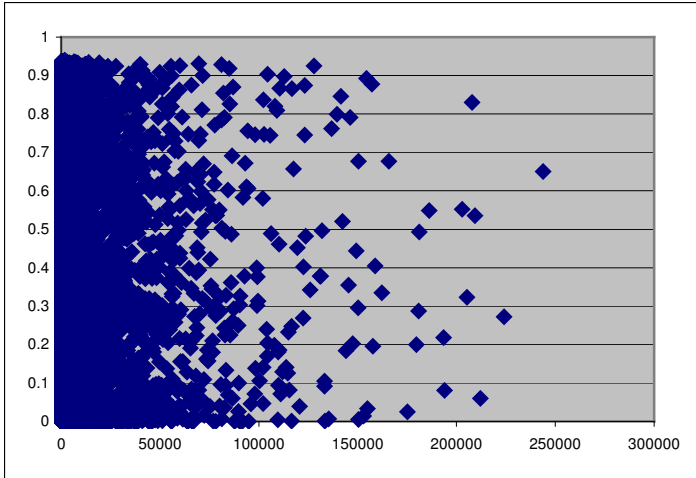

Liver

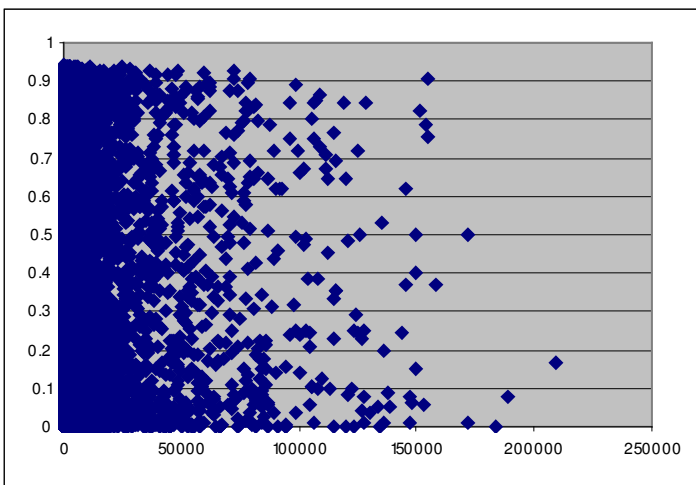

BAT

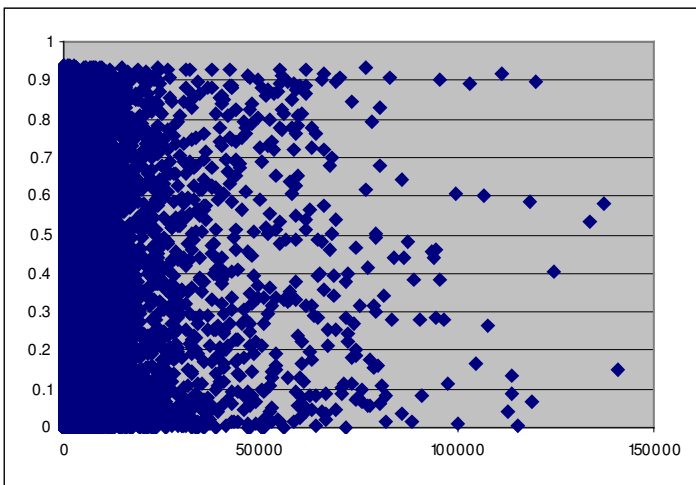

iWAT

Supplementary Figure 4. Relation between  $p$ -value (estimated by permutation test). In all three tissues, the mean expression level (raw) is plotted on the abscissa (x axis) and the corresponding  $p$  value on the ordinate (y axis).
