# Supplementary material
Source: PubMed Central journal article supplement (PMC1420654)
Supplement: pcbi.0020016.st001.pdf [file pcbi.0020016.st001.pdf]

# KEGGCharts

 Show Annotation

 Show Chart Data

 Open in New Window

| PATHWAY                                                               |            |
|-----------------------------------------------------------------------|------------|
| <a href="#">Circadian rhythm</a>                                      | ■ 2.0% (9) |
| <a href="#">Glycerolipid metabolism</a>                               | ■ 1.1% (5) |
| <a href="#">Purine metabolism</a>                                     | ■ 1.1% (5) |
| <a href="#">Butanoate metabolism</a>                                  | ■ 0.9% (4) |
| <a href="#">Sterol biosynthesis</a>                                   | ■ 0.9% (4) |
| <a href="#">Synthesis and degradation of ketonebodies</a>             | ■ 0.9% (4) |
| <a href="#">Valine, leucine and isoleucinedegradation</a>             | ■ 0.9% (4) |
| <a href="#">Citrate cycle (TCA cycle)</a>                             | ■ 0.7% (3) |
| <a href="#">Fatty acid metabolism</a>                                 | ■ 0.7% (3) |
| <a href="#">Pyruvate metabolism</a>                                   | ■ 0.7% (3) |
| <a href="#">ATP synthesis</a>                                         | ■ 0.4% (2) |
| <a href="#">Aminosugarsmetabolism</a>                                 | ■ 0.4% (2) |
| <a href="#">Glycolysis / Gluconeogenesis</a>                          | ■ 0.4% (2) |
| <a href="#">Nicotinate andnicotinamide metabolism</a>                 | ■ 0.4% (2) |
| <a href="#">Oxidative phosphorylation</a>                             | ■ 0.4% (2) |
| <a href="#">Propanoate metabolism</a>                                 | ■ 0.4% (2) |
| <a href="#">Pyrimidine metabolism</a>                                 | ■ 0.4% (2) |
| <a href="#">Reductive carboxylate cycle (CO2fixation)</a>             | ■ 0.4% (2) |
| <a href="#">Terpenoidbiosynthesis</a>                                 | ■ 0.4% (2) |
| <a href="#">Alzheimer's disease</a>                                   | ■ 0.2% (1) |
| <a href="#">Arginine and proline metabolism</a>                       | ■ 0.2% (1) |
| <a href="#">Basal transcriptionfactors</a>                            | ■ 0.2% (1) |
| <a href="#">Fructose and mannose metabolism</a>                       | ■ 0.2% (1) |
| <a href="#">Glutamate metabolism</a>                                  | ■ 0.2% (1) |
| <a href="#">Glutathione metabolism</a>                                | ■ 0.2% (1) |
| <a href="#">N-Glycansbiosynthesis</a>                                 | ■ 0.2% (1) |
| <a href="#">Nitrogen metabolism</a>                                   | ■ 0.2% (1) |
| <a href="#">Porphyrin andchlorophyll metabolism</a>                   | ■ 0.2% (1) |
| <a href="#">Prion disease</a>                                         | ■ 0.2% (1) |
| <a href="#">Sphingoglycolipidmetabolism</a>                           | ■ 0.2% (1) |
| <a href="#">Tyrosine metabolism</a>                                   | ■ 0.2% (1) |
| <a href="#">Glycosylphosphatidylinositol(GPI)-anchor biosynthesis</a> | ■ 0.2% (1) |
| <a href="#">Phosphatidylinositol signaling system</a>                 | ■ 0.2% (1) |

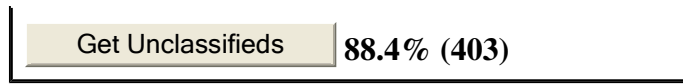

53 out of 456 uniqids were classified
